# Supplementary material for: Nonstoichiometry as a hidden aspect of TbAl3(BO3)4 optical properties
Source: Royal Society of Chemistry journal article supplement (doi:10.1039/d4dt02695k), 2024-01-01
Supplement: d4dt02695k1.pdf [file d4dt02695k1.pdf]

## Nonstoichiometry as a hidden aspect of $\text{TbAl}_3(\text{BO}_3)_4$ optical properties

A.B. Kuznetsov<sup>1</sup>, A.Y. Jamous<sup>1,2</sup>, M. I. Rakhmanova<sup>3</sup>, E.A. Simonova<sup>1</sup>, V.A. Svetlichnyi<sup>2</sup>, A.E. Kokh<sup>1</sup>, V.N. Yudin<sup>3</sup>, S.F. Solodovnikov<sup>3</sup>, V.S. Shevchenko<sup>1</sup> and K.A. Kokh<sup>1</sup>

### Authors details

<sup>1</sup> Sobolev Institute of Geology and Mineralogy SB RAS, Novosibirsk 630090, Russia

<sup>2</sup> Tomsk State University, Tomsk 634050, Russia

<sup>3</sup> Nikolaev Institute of Inorganic Chemistry SB RAS, Novosibirsk 630090, Russia

\*Corresponding author.

E-mail address: [ku.artemy@igm.nsc.ru](mailto:ku.artemy@igm.nsc.ru) (A.B. Kuznetsov).

Table S1. Summary data about the single crystal XRD data-collection parameters, structure refinement of crystals from batch II (Figure 1).

|                                                  |                                                                   |
|--------------------------------------------------|-------------------------------------------------------------------|
| Chemical formula                                 | $\text{TbAl}_3(\text{BO}_3)_4$                                    |
| Temperature (K)                                  | 220                                                               |
| Cell setting                                     | trigonal                                                          |
| Space group                                      | $R\bar{3}2$                                                       |
| $a$ (Å)                                          | 9.2986(2)                                                         |
| $b$ (Å)                                          | 9.2986(2)                                                         |
| $c$ (Å)                                          | 7.2542(2)                                                         |
| $\alpha$ (°)                                     | 90                                                                |
| $\beta$ (°)                                      | 90                                                                |
| $\gamma$ (°)                                     | 120                                                               |
| $V$ (Å <sup>3</sup> )                            | 543.19(3)                                                         |
| $Z$                                              | 3                                                                 |
| Calculated density, $D_x$ (g cm <sup>-3</sup> )  | 4.357                                                             |
| Crystal size (mm)                                | 0.18 × 0.09 × 0.03                                                |
| Crystal form                                     | plate                                                             |
| <b>Data collection</b>                           |                                                                   |
| Diffractometer                                   | Bruker D8 Venture diffractometer, Bruker PHOTON III area detector |
| Radiation; $\lambda$                             | $\text{MoK}\alpha$ ; 0.71073                                      |
| Data range $\theta$ (°); $h, k, l$               | $-14 < h < 14$ ,<br>$-14 < k < 12$ ,<br>$-11 < l < 11$            |
| No. of measured reflections                      | 4817                                                              |
| Total reflections ( $N_2$ ) / observed ( $N_1$ ) | 538                                                               |
| Criterion for observed reflections               | $I > 3\sigma(I)$                                                  |
| $R_{\text{int}}$ (%)                             | 5.05                                                              |
| <b>Refinement</b>                                |                                                                   |
| $R_1, wR_1 [I > 3\sigma(I)]$                     | 0.0094                                                            |
| $R_1, wR_1 [\text{all}]$                         | 0.0219                                                            |
| GooF (Goodness of fit)                           | 1.1                                                               |

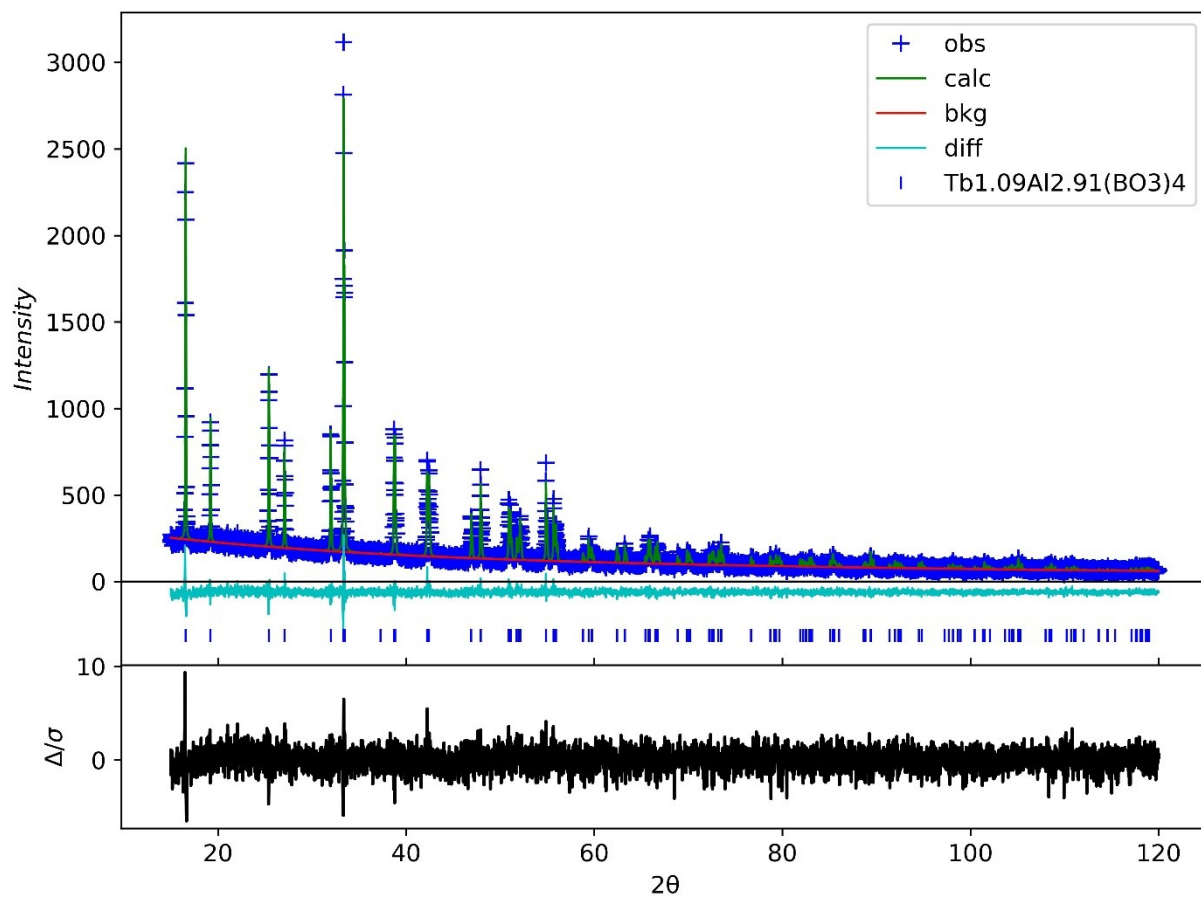

Figure S1. Rietveld plot of the sample from batch II (Figure 1).

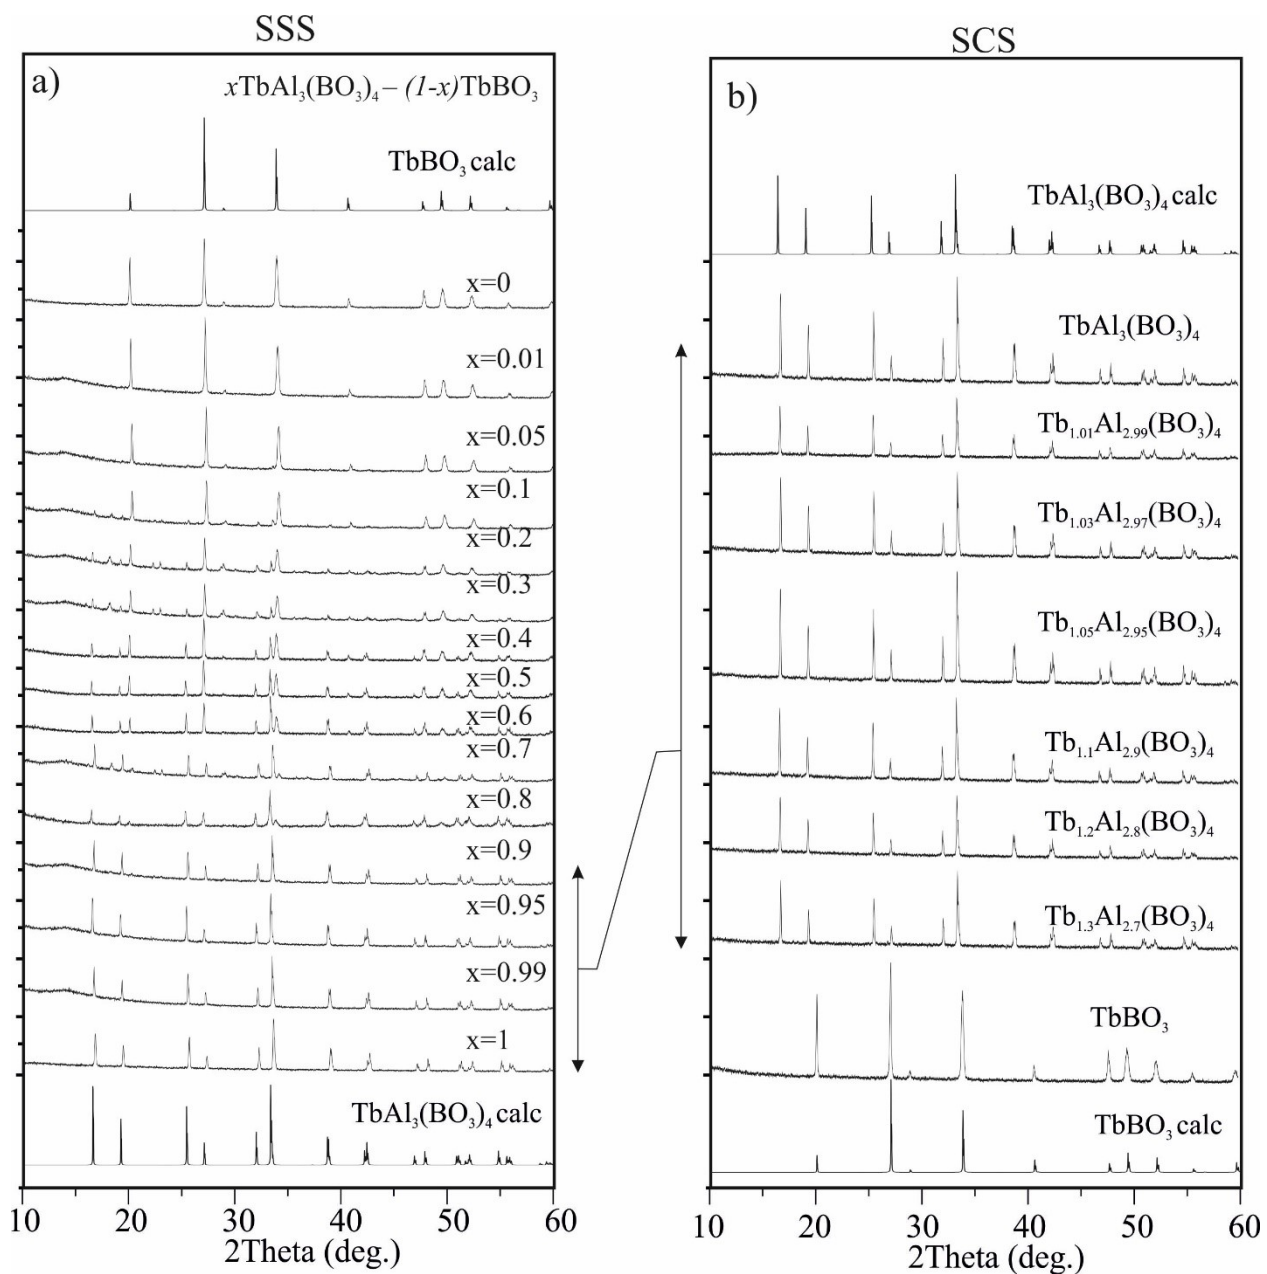

Figure S2. XRD patterns of  $x\text{TbAl}_3(\text{BO}_3)_4 - (1-x)\text{TbBO}_3$  samples annealing at  $1100^\circ\text{C}$  in Ar atmosphere.

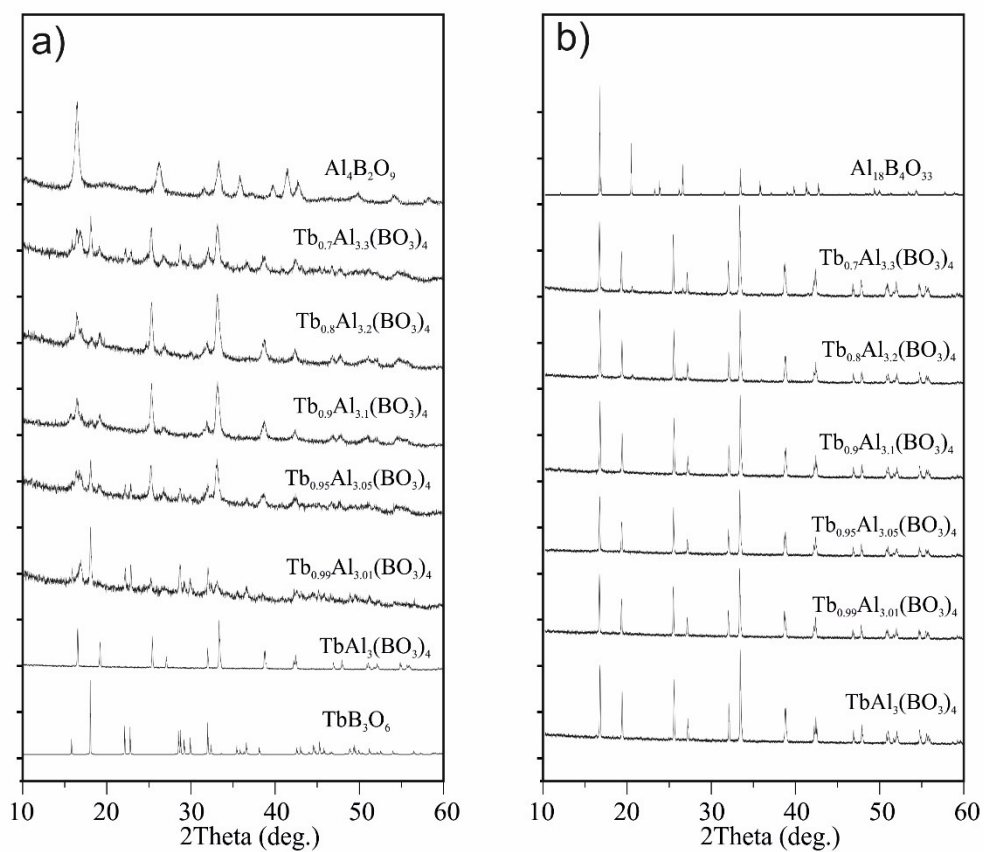

Figure S3 XRD patterns of  $x\text{TbAl}_3(\text{BO}_3)_4 - (1-x)\text{Al}_2\text{O}_3 + \text{B}_2\text{O}_3$  samples annealing at a) 800 °C and b) 1200 °C in Ar atmosphere

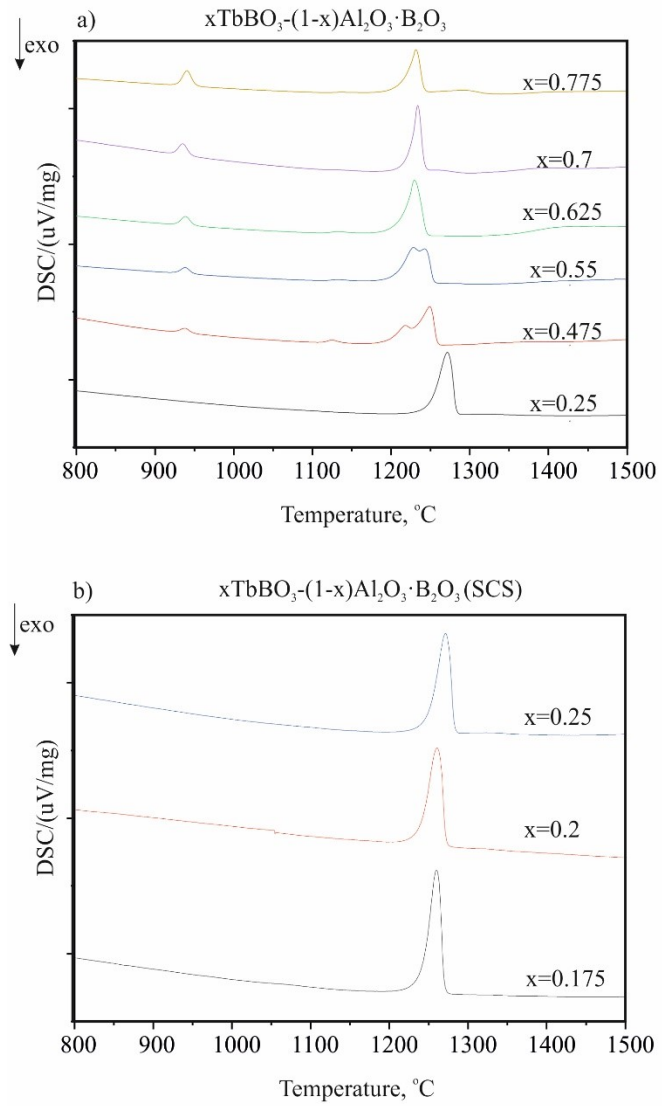

Figure S4. DSC curves of  $x\text{TbBO}_3-(1-x)\text{Al}_2\text{O}_3\cdot\text{B}_2\text{O}_3$  samples syntheses by a) SSS (1100°C) and b) SCS (1200°C).

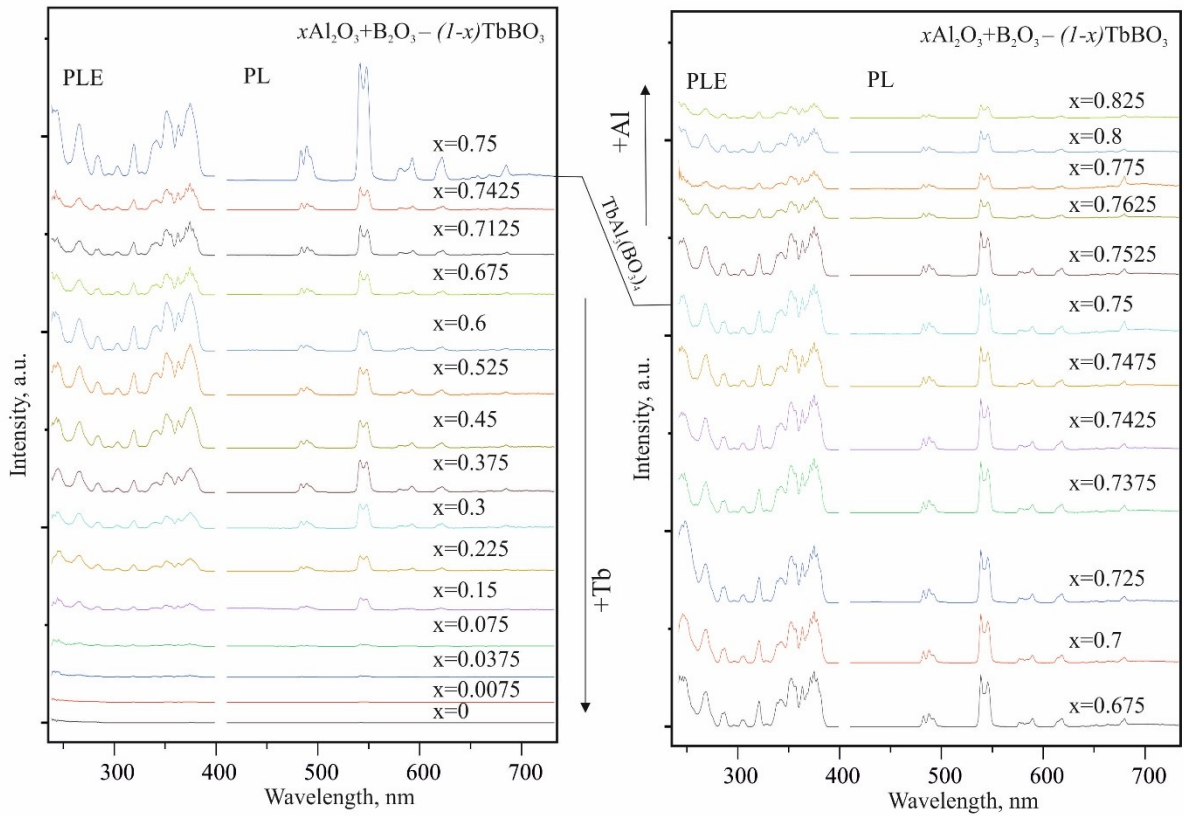

Figure S5 The excitation (PLE) and emission (PL) spectra of the a)  $\text{TbAl}_3(\text{BO}_3)_4\text{-TbBO}_3$  1100°C\_Ar and b) annealing at 1200 C after combusted method  $\lambda_{\text{ex}} = 375$  nm,  $\lambda_{\text{em}} = 541$  nm, T = 300 K

Table S2. Summary data about the powder XRD data-collection parameters, the Rietveld structure refinement of crystals from batch II (Figure 1).

|                                     |                                                                       |
|-------------------------------------|-----------------------------------------------------------------------|
| Empirical formula                   | Tb <sub>1.12</sub> Al <sub>2.88</sub> (BO <sub>3</sub> ) <sub>4</sub> |
| Formula weight                      | 490.89                                                                |
| Crystal system                      | trigonal                                                              |
| Space group                         | R32                                                                   |
| a (Å)                               | 9.2967(3)                                                             |
| b (Å)                               | 9.2967(3)                                                             |
| c (Å)                               | 7.2511(1)                                                             |
| α                                   | 90                                                                    |
| β°                                  | 90                                                                    |
| γ                                   | 120                                                                   |
| Z                                   | 3                                                                     |
| Volume (Å <sup>3</sup> )            | 542.74(3)                                                             |
| Diffractometer                      | TD 3700(Tongda, China)                                                |
| Radiation type                      | CuKa                                                                  |
| Wavelength (Å°)                     | 1.5418                                                                |
| Profile range (2teta)               | 10-120                                                                |
| Step size (12y)                     | 0.02                                                                  |
| Number of observation (N)           | 5499                                                                  |
| Number of contributing reflections  | 113                                                                   |
| Number of structure parameters (P1) | 24                                                                    |
| Number of profile parameters (P2)   | 10                                                                    |
| R <sub>Bragg</sub> (%)              | 8.44                                                                  |
| R <sub>p</sub> (%)                  | 7.36                                                                  |
| R <sub>wp</sub> (%)                 | 9.36                                                                  |
| R <sub>exp</sub> (%)                | 8.39                                                                  |
| GOF                                 | 1.118                                                                 |

Table S3. The final atomic coordinates and equivalent isotropic displacement parameters in Tb<sub>1.12</sub>Al<sub>2.88</sub>(BO<sub>3</sub>)<sub>4</sub>.

| Atom | x          | y          | z         | occ      | U_iso_or_equiv |
|------|------------|------------|-----------|----------|----------------|
| Tb1  | 0          | 0          | 0         | 1        | 0.0226(9)      |
| Tb2  | 0.5555(7)  | 0          | 0         | 0.040(6) | 0.034(4)       |
| Al3  | 0.5555(7)  | 0          | 0         | 0.960(6) | 0.034(4)       |
| B1   | 0          | 0          | 0,5       | 1        | 0.031(7)       |
| B2   | 0.429(7)   | 0          | 0,5       | 1        | 0.031(7)       |
| O1   | 0.1416(12) | 0.1416(12) | 0,5       | 1        | 0.016(2)       |
| O2   | 0.4423(12) | 0.1420(11) | 0.519 (2) | 1        | 0.016(2)       |
| O3   | 0.578(3)   | 0          | 0,5       | 1        | 0.016(2)       |
